# Supplementary material for: From post-war reconstruction to the 21st century – Ophthalmic pathology in Freiburg 1945-2015. Part 2: Review of 43,169 histological diagnoses from 39,256 specimens collected over 71 years at a large German tertiary eye care centre
Source: Research Square preprint supplement (doi:10.21203/rs.3.rs-7753867/v1), 2025-10-17
Supplement: Supplementary file 1 [file 04ebeda5f40deaf62f975078.xlsx]

## Sheet: Table 4
	Table 4: Comparison of corneal diagnoses with results from other studies
	Study	Region	Time period	Fuchs’ dystrophy (%)	Keratoconus (%)	Keratitis (%)	Transplant failure (%)
	Rohrbach et al. [8]	Tübingen (DE)	1940		0
	Our study	Freiburg (DE)	1945		0
	Rohrbach et al. [8]	Tübingen (DE)	1960		8
	Our study	Freiburg (DE)	1960		17
	Rohrbach et al. [8]	Tübingen (DE)	1980		27
	Our study	Freiburg (DE)	1980		30
	Rohrbach et al. [8]	Tübingen (DE)	1990		28
	Our study	Freiburg (DE)	1990		20
	Rahman et al. [26]	Manchester (UK)	2007-2008	15.4	21.7	5.8a	22.3
	Our study	Freiburg (DE)	2007-2008	19	19	12	17
	Spraul and Grossniklaus [10]	Atlanta (US)	1941-1995	16b	11	19
	Our study	Freiburg (DE)	1945-1995	8	19	14
	Gosheh et al. [27]	Philadelphia (US)	2001-2005	10.8	16	2.7c	22.0
	Our study	Freiburg (DE)	2001-2005	19	18	17	10
	Kelly et al. [33]	Australia	1985-2009		31		19
	Our study	Freiburg (DE)	1985-2009		19		11
	Keane et al. [29]	Australia	1985-2020	18	24	3.7d	24
	Our study	Freiburg (DE)	1985-2015	24	15	12	13
	Edwards et al [30]	New Zealand	1991-1999	4.4	45.6	7.3e	8.7
	Our study	Freiburg (DE)	1991-1999	9.2	22	12	7.1
	Cunningham et al. [31]	New Zealand	2000-2009	8.2	41.1	7.9	17.0
	Our study	Freiburg (DE)	2000-2009	19	18	15	13
	Xie et al. [F35]	North China	1997-2002		12.9	31.8	4.5
	Our study	Freiburg (DE)	1997-2002		23	15	4.5
	Matthaei et al. [32]	Europe	1980-2014	10.2	24.2	13.2
		North America	1980-2014	12.9	14.2		16.3
		Asia	1980-2014		8.1	32.5	11.1
	Our study	Freiburg (DE)	1980-2014	20	16	13	13
	This table presents a comparison of the relative frequencies of the four most prevalent corneal diagnoses in our study with those reported in existing literature.
	a Ulcerative and infectious keratitis
	b 92.6% of all corneal dystrophies which represented 16.8% of all cornea buttons excised during penetrating keratoplasty
	c Viral keratitis
	d Clinical diagnosis, histologically not confirmed
	e Herpes simplex and herpes zoster keratitis
