# Supplementary material for: From post-war reconstruction to the 21st century – Ophthalmic pathology in Freiburg 1945-2015. Part 2: Review of 43,169 histological diagnoses from 39,256 specimens collected over 71 years at a large German tertiary eye care centre
Source: Research Square preprint supplement (doi:10.21203/rs.3.rs-7753867/v1), 2025-10-17
Supplement: Supplementary file 2 [file 1b93b6b2fb4dfae6fbb314f2.xlsx]

## Sheet: Table 1
	Table 1: Frequency and trends in common diagnoses by topographical region
	Eyelid (n=21,764)	1945-1954		1955-1964		1965-1974		1975-1984		1985-1994		1995-2004		2005-2015
		SCC	18 (22%)	Papilloma	46 (22%)	BCC	196 (26%)	Papilloma	570 (26%)	Papilloma	655 (22%)	Chalazion	1,008 (20%)	Chalazion	2,293 (22%)
		BCC	17 (21%)	BCC	43 (20%)	Papilloma	135 (18%)	BCC	450 (20%)	BCC	531 (18%)	Papilloma	772 (16%)	BCC	1,541 (15%)
		Papilloma	12 (14%)	SCC	25 (12%)	Nevus	58 (7.8%)	Chalazion	166 (7.5%)	Chalazion	432 (14%)	BCC	769 (16%)	Papilloma	1,188 (11%)
		Chalazion	7 (8.4%)	Chalazion	12 (5.5%)	Epidermal cyst	47 (6.3%)	Nevus	142 (6.4%)	Nevus	177 (5.9%)	Resection after R1	351 (7.1%)	Resection after R1	1,025 (10%)
		Molluscum contagiosum	5 (6.0%)	Granuloma	10 (4.8%)	Chalazion	44 (5.9%)	Epidermal cyst	135 (6.1%)	Hidrocystoma	123 (4.1%)	Nevus	257 (5.2%)	Hidrocystoma	433 (4.1%)
		Xanthelasma	5 (6.0%)	Nevus	9 (4.3%)	Dermoid cyst	36 (4.8%)	Dermoid cyst	64 (2.9%)	Epidermal cyst	115 (3.8%)	Hidrocystoma	144 (2.9%)	Nevus	349 (3.3%)
		Epidermal cyst	4 (4.8%)	Epidermal cyst	8 (3.8%)	Hemangioma	20 (2.7%)	Hidrocystoma	47 (2.1%)	Dermoid cyst	60 (2.0%)	Epidermal cyst	120 (2.4%)	Xanthelasma	305 (2.9%)
		Dermoid cyst	2 (2.4%)	Actinic keratosis	6 (2.9%)	Granuloma	13 (1.7%)	Hemangioma	34 (1.5%)	Granuloma	56 (1.9%)	Dermoid cyst	80 (1.6%)	Epidermal cyst	299 (2.8%)
		Fibroma	2 (2.4%)	Dermoid cyst	5 (2.4%)	Neurofibroma	9 (1.2%)	Granuloma	33 (1.5%)	Hemangioma	52 (1.7%)	Xanthelasma	78 (1.6%)	Blepharitis	191 (1.8%)
		Granuloma	2 (2.4%)	Granulation tissue	4 (1.9%)	Molluscum contagiosum	8 (1.1%)	Xanthelasma	31 (1.4%)	Resection after R1	39 (1.3%)	Blepharitis	76 (1.5%)	Malposition	153 (1.4%)
		Nevus	2 (2.4%)	Hemangioma	4 (1.9%)	SCC	8 (1.1%)
						Xanthelasma	8 (1.1%)
		Other diagnoses	7 (8.4%)	Other diagnoses	38 (18%)	Other diagnoses	164 (22%)	Other diagnoses	534 (24%)	Other diagnoses	769 (26%)	Other diagnoses	1,287 (26%)	Other diagnoses	2,791 (26%)
		Sum	83	Sum	210	Sum	746	Sum	2.206	Sum	3.009	Sum	4.942	Sum	10.568
	Cornea (n=7,319)	1945-1954		1955-1964		1965-1974		1975-1984		1985-1994		1995-2004		2005-2015
		Ulcer	7 (26%)	Inflammation	13 (27%)	Scar	76 (29%)	Keratoconus	122 (22%)	Keratoconus	155 (19%)	Keratoconus	217 (18%)	Fuchs’ dystrophy	1,082 (25%)
		Inflammation	6 (22%)	Scar	7 (14%)	Keratoconus	33 (13%)	Inflammation	107 (19%)	BK w	114 (14%)	Inflammation	165 (14%)	Transplant failure	603 (14%)
		Transplant failure	4 (15%)	Dermoid	6 (12%)	Inflammation	29 (11%)	Scar	89 (16%)	Scar	101 (12%)	Fuchs’ dystrophy	150 (12%)	Keratoconus	446 (10%)
		SCC	4 (15%)	Infection	4 (8.2%)	Transplant failure	28 (11%)	Transplant failure	55 (10%)	Inflammation	77 (9.4%)	BK w/o	128 (11%)	Inflammation	435 (10%)
		Degeneration	2 (7.4%)	Ulcer	4 (8.2%)	Fuchs’ dystrophy	21 (8.1%)	Fuchs’ dystrophy	50 (8.8%)	Fuchs’ dystrophy	62 (7.6%)	Ulcer	93 (7.6%)	Scar	368 (8.4%)
		Scar	2 (7.4%)	Degeneration	3 (6.1%)	Infection	10 (3.8%)	BK w	29 (5.1%)	Transplant failure	48 (5.9%)	Scar	87 (7.2%)	BK w/o	288 (6.6%)
		Epithelial defect	1 (3.7%)	Transplant failure	3 (6.1%)	Ulcer	7 (2.7%)	Ulcer	19 (3.3%)	Ulcer	35 (4.3%)	Transplant failure	65 (5.3%)	Ulcer	246 (5.6%)
		Melanoma	1 (3.7%)	Keratoconus	2 (4.1%)	Dermoid	6 (2.3%)	BK w/o	9 (1.6%)	Infection	26 (3.2%)	Infection	52 (4.3%)	Salzmann	189 (4.3%)
				CIN	1 (2.0%)	BK w	4 (1.5%)	Macular dystrophy	9 (1.6%)	BK w/o	23 (2.8%)	BK w	39 (3.0%)	Infection	154 (3.5%)
				Cyst	1 (2.0%)	Granular dystrophy	4 (1.5%)	Infection	7 (1.2%)	Macular dystrophy	12 (1.5%)	Salzmann	25 (2.1%)	BK w	79 (1.8%)
				Epithelial hyperplasia	1 (2.0%)
				Limbal papillae	1 (2.0%)
				Melanoma	1 (2.0%)
				Normal	1 (2.0%)
				SCC	1 (2.0%)
		Other diagnoses	0	Other diagnoses	0	Other diagnoses	42 (16%)	Other diagnoses	72 (13%)	Other diagnoses	164 (20%)	Other diagnoses	195 (16%)	Other diagnoses	492 (11%)
		Sum	27	Sum	49	Sum	260	Sum	568	Sum	817	Sum	1.216	Sum	4.382
	Conjunctiva (n=5,963)	1945-1954		1955-1964		1965-1974		1975-1984		1985-1994		1995-2004		2005-2015
		Conjunctivitis	10 (21%)	Conjunctivitis	17 (20%)	Nevus	46 (16%)	Nevus	85 (20%)	Pterygium	130 (21%)	Pterygium	511 (31%)	Pterygium	1,060 (37%)
		Granulation	5 (10%)	Granuloma	13 (16%)	Cyst	30 (10%)	Papilloma	43 (10%)	Nevus	99 (16%)	Nevus	165 (10%)	Nevus	281 (10%)
		Granuloma	5 (10%)	Papilloma	10 (12%)	Conjunctivitis	27 (9.4%)	Pyogenic granuloma	43 (10%)	Pyogenic granuloma	71 (11%)	Conjunctivitis	115 (7.0%)	Pyogenic granuloma	194 (6.8%)
		Nevus	5 (10%)	Melanoma	5 (6.0%)	Papilloma	27 (9.4%)	Conjunctivitis	34 (7.9%)	Conjunctivitis	45 (7.2%)	Pyogenic granuloma	99 (6.0%)	CIN	188 (6.6%)
		SCC	5 (10%)	Nevus	5 (6.0%)	Pterygium	23 (8.0%)	Cyst	27 (6.3%)	Papilloma	39 (6.2%)	Cyst	62 (3.8%)	Conjunctivitis	121 (4.2%)
		Cyst	3 (6.3%)	Cyst	4 (4.8%)	Granuloma	15 (5.2%)	CIN	23 (5.3%)	Cyst	32 (5.1%)	CIN	56 (3.4%)	Pinguecula	107 (3.8%)
		Papilloma	3 (6.3%)	SCC	4 (4.8%)	Pinguecula	12 (4.2%)	Pterygium	20 (4.6%)	Scar tissue	26 (4.1%)	Scar tissue	55 (3.4%)	Cyst	96 (3.4%)
		Pinguecula	3 (6.3%)	CIN	3 (3.6%)	CIN	9 (3.1%)	Melanoma	18 (4.2%)	CIN	20 (3.2%)	Pinguecula	54 (3.3%)	Melanosis	76 (2.7%)
		Pyogenic granuloma	2 (4.2%)	Pyogenic granuloma	3 (3.6%)	Granulation	8 (2.8%)	Granuloma	11 (2.6%)	Pinguecula	19 (3.0%)	Melanosis	45 (2.7%)	Papilloma	66 (2.3%)
		Fibroma	1 (2.1%)	Lymphoma	2 (2.4%)	Pyogenic granuloma	7 (2.4%)	SCC	11 (2.6%)	Melanosis	15 (2.4%)	Papilloma	44 (2.7%)	Normal	65 (2.3%)
		Hemangioma	1 (2.1%)	Metastasis	2 (2.4%)
		Hyperplasia	1 (2.1%)	Pingucula	2 (2.4%)
		Melanoma	1 (2.1%)	Pterygium	2 (2.4%)
		Oncocytoma	1 (2.1%)
		Sebaceous adenoma	1 (2.1%)
		Sebaceous hyperplasia	1 (2.1%)
		Other diagnoses	0	Other diagnoses	11 (13%)	Other diagnoses	83 (29%)	Other diagnoses	116 (27%)	Other diagnoses	132 (21%)	Other diagnoses	431 (26%)	Other diagnoses	595 (21%)
		Sum	48	Sum	83	Sum	287	Sum	431	Sum	628	Sum	1.637	Sum	2.849
	Orbit (n=535)	1945-1954		1955-1964		1965-1974		1975-1984		1985-1994		1995-2004		2005-2015
		Connective tissue	2 (14%)	Inflammation	14 (42%)	Fibrotic muscle	7 (11%)	Inflammation	12 (13%)	Granuloma	11 (11%)	Lymphoma	24 (17%)	Lymphoma	24 (28%)
		Inflammation	2 (14%)	Normal muscle	4 (12%)	Normal muscle	7 (11%)	Hemangioma	9 (10%)	Inflammation	10 (10%)	Metastasis	17 (12%)	Fat tissue	11 (13%)
		Dermoid cyst	1 (7.1%)	Granuloma	2 (6.1%)	Inflammation	6 (9.2%)	Melanoma	6 (6.6%)	Fat tissue	9 (8.7%)	Fat tissue	15 (10%)	Inflammation	9 (11%)
		Granuloma	1 (7.1%)	Hemangioma	2 (6.1%)	Muscular dystrophy	6 (9.2%)	Connective tissue	4 (4.4%)	Hemangioma	9 (8.7%)	Inflammation	12 (8.3%)	Scar	8 (9.4%)
		Hemangioma	1 (7.1%)	Meningeoma	2 (6.1%)	Hemangioma	5 (7.7%)	Meningeoma	4 (4.4%)	Varix	7 (6.8%)	Dermoid cyst	7 (4.9%)	Granuloma	7 (8.2%)
		Hematoma	1 (7.1%)	Metastasis	2 (6.1%)	Metastasis	3 (4.6%)	Dermoid cyst	3 (3.3%)	Metastasis	5 (4.9%)	Hemangioma	7 (4.9%)	Metastasis	5 (5.9%)
		Hyperplastic lymph node	1 (7.1%)	Sarcoma	2 (6.1%)	Dermoid cyst	2 (3.1%)	FH	3 (3.3%)	Lymphangioma	4 (3.9%)	Normal muscle	7 (4.9%)	Melanoma	3 (3.5%)
		Leucemia	1 (7.1%)	Scar	2 (6.1%)	Granuloma	2 (3.1%)	Granulation	3 (3.3%)	Normal muscle	4 (3.9%)	Schwannoma	6 (4.2%)	Cyst	2 (2.4%)
		Lymphoma	1 (7.1%)	Dermoid cyst	1 (3.0%)	Melanoma	2 (3.1%)	MFH	3 (3.3%)	SCC	4 (3.9%)	Granuloma	3 (2.1%)	Hemangioma	2 (2.4%)
		Metastasis	1 (7.1%)	Fat tissue	1 (3.0%)	Meningeoma	2 (3.1%)	Rhabdo-myosarcoma	3 (3.3%)	Connective tissue	3 (2.9%)	Lymphangioma	3 (2.1%)	Langerhans cell histiocytosis	2 (2.4%)
		Necrosis	1 (7.1%)	Osteoblastoma	1 (3.0%)	Mucocele	2 (3.1%)			Dermoid cyst	3 (2.9%)			Schwannoma	2 (2.4%)
		Unknown tumour	1 (7.1%)							Schwannoma	3 (2.9%)
		Other diagnoses	0	Other diagnoses	0	Other diagnoses	21 (32%)	Other diagnoses	41 (45%)	Other diagnoses	31 (30%)	Other diagnoses	43 (30%)	Other diagnoses	10 (12%)
		Sum	14	Sum	33	Sum	65	Sum	91	Sum	103	Sum	144	Sum	85
	Lacrimal duct system (n=303)	1945-1954		1955-1964		1965-1974		1975-1984		1985-1994		1995-2004		2005-2015
		Dacryocystitis	23 (72%)	Dacryocystitis	42 (89%)	Dacryocystitis	11 (50%)	Dacryocystitis	16 (43%)	Dacryocystitis	10 (33%)	Dacryocystitis	32 (46%)	Dacryocystitis	27 (40%)
		Tuberculosis	3 (9.4%)	Carcinoma	2 (4.3%)	Canaliculitis	3 (14%)	Canaliculitis	9 (26%)	Canaliculitis	5 (17%)	Lacrimal sac concrement	17 (24%)	Canaliculitis	20 (30%)
		SCC	2 (6.3%)	Connective tissue	1 (2.1%)	Lacrimal sac concrement	2 (9.1%)	Lacrimal sac soncrement	6 (11%)	Scar	5 (17%)	Canaliculitis	6 (8.6%)	Lacrimal sac concrement	10 (15%)
		Granulation	1 (3.1%)	Cyst	1 (2.1%)	Melanoma	2 (9.1%)	Scar	2 (5.7%)	Lacrimal sac concrement	4 (13%)	Normal	5 (7.1%)	Lymphoma	3 (4.5%)
		Normal	1 (3.1%)	Lacrimal sac concrement	1 (2.1%)	Normal	2 (9.1%)	Fistula	1 (2.9%)	Normal	2 (6.7%)	Lymphoma	4 (5.7%)	Normal	3 (4.5%)
		Post-inflammation	1 (3.1%)			Scar	1 (4.5%)	Lymphatic hyperplasia	1 (2.9%)			Benign Tumour	1 (1.4%)	Fistula	2 (3.0%)
		Scar	1 (3.1%)			Presaccal stenosis	1 (4.5%)					Diverticula	1 (1.4%)
												Fistula	1 (1.4%)
												Granulation	1 (1.4%)
												Mucoepidermoid-carcinoma	1 (1.4%)
												Scar	1 (1.4%)
		Other diagnoses	0	Other diagnoses	0	Other diagnoses	0	Other diagnoses	0	Other diagnoses	4 (13%)	Other diagnoses	0	Other diagnoses	2 (3.0%)
		Sum	32	Sum	47	Sum	22	Sum	35	Sum	30	Sum	70	Sum	67
	Uvea (n=220)	1945-1954		1955-1964		1965-1974		1975-1984		1985-1994		1995-2004		2005-2015
		Iritis	7 (39%)	Post-iritis	3 (25%)	Iris melanoma	7 (26%)	Iris melanoma	7 (18%)	Normal Iris	5 (24%)	Normal Iris	18 (30%)	Iris melanoma	8 (19%)
		Iris atrophy	3 (17%)	Iris melanoma	2 (17%)	Iritis	6 (22%)	Iris nevus	3 (7.5%)	Ciliary body melanoma	2 (9.5%)	Iris melanoma	10 (17%)	Normal iris	7 (17%)
		Iris nevus	3 (17%)	Iritis	2 (17%)	Iris cyst	4 (15%)	Normal choroid	3 (7.5%)	Iris melanoma	2 (9.5%)	Ciliary body melanoma	7 (12%)	Iritis	7 (17%)
		Choroidal fibrosarcoma	1 (5.6%)	Iris atrophy	1 (8.3%)	Normal Iris	3 (11%)	Normal iris	3 (7.5%)	Iris nevus	2 (9.5%)	Iritis	5 (8.3%)	Choroidal melanoma	4 (10%)
		Iris edema	1 (5.6%)	Normal ciliary body	1 (8.3%)	Ciliary body adenoma	1 (3.7%)	Rubeosis iridis	3 (7.5%)	Necrotis Iris	2 (9.5%)	Iris nevus	4 (6.7%)	Ciliary body melanoma	2 (4.8%)
		Iris melanoma	1 (5.6%)	Normal iris	1 (8.3%)	Iris fibroma	1 (3.7%)							Iris nevus	2 (4.8%)
		Lisch nodule	1 (5.6%)	Thickened iris stroma	1 (8.3%)	Iris melanocytoma	1 (3.7%)							Iris prolapse	2 (4.8%)
		Normal Iris	1 (5.6%)	Xanthogranuloma	1 (8.3%)	Irishyperplasia	1 (3.7%)
						Uveal foreign body granuloma	1 (3.7%)
						Uveal hyperemia	1 (3.7%)
						Vascularised iris	1 (3.7%)
		Other diagnoses	0	Other diagnoses	0	Other diagnoses	0	Other diagnoses	21 (53%)	Other diagnoses	8 (38%)	Other diagnoses	16 (27%)	Other diagnoses	10 (24%)
		Sum	18	Sum	12	Sum	27	Sum	40	Sum	21	Sum	60	Sum	42
	Intraocular tissue, unspecified (n=198)	1945-1954		1955-1964		1965-1974		1975-1984		1985-1994		1995-2004		2005-2015
		-		-		Trauma-associated without retina	2 (100%)	Trauma-associated without retina	1 (100%)	Trauma-associated without retina	29 (67%)	Trauma-associated without retina	60 (73%)	Trauma-associated without retina	54 (77%)
										Trauma-associated with retina	14 (33%)	Trauma-associated with retina	21 (26%)	Trauma-associated with retina	14 (20%)
												Bacterial endophthalmitis	1 (1.2%)	Fibrin	1 (1.4%)
														Purulent endophthalmitis	1 (1.4%)
		Other diagnoses	0	Other diagnoses	0	Other diagnoses	0	Other diagnoses	0	Other diagnoses	0	Other diagnoses	0	Other diagnoses	0
		Sum	0	Sum	0	Sum	2	Sum	1	Sum	43	Sum	82	Sum	70
	Vitreous (n=178)	1945-1954		1955-1964		1965-1974		1975-1984		1985-1994		1995-2004		2005-2015
		-		Normal	1 (100%)	Normal	1 (50%)	Vitritis	2 (33%)	Vitritis	13 (52%)	Vitritis	36 (49%)	Vitritis	32 (45%)
						Pigmented connective tissue	1 (50%)	Blood	1 (17%)	Normal	4 (16%)	Normal	9 (12%)	Normal	11 (15%)
								Foreign body granuloma	1 (17%)	Blood	3 (12%)	PHPV	5 (6.8%)	Lymphoma not ruled out	7 (10%)
								Normal	1 (17%)	Oxalate crystals	2 (8.0%)	Blood	4 (5.5%)	Lymphoma	6 (8.5%)
								PHPV	1 (17%)	PHPV	2 (8.0%)	Lymphoma	4 (5.5%)	Blood	3 (4.2%)
		Other diagnoses	0	Other diagnoses	0	Other diagnoses	0	Other diagnoses	0	Other diagnoses	1 (4.0%)	Other diagnoses	15 (21%)	Other diagnoses	12 (17%)
		Sum	0	Sum	1	Sum	2	Sum	6	Sum	25	Sum	73	Sum	71
	Lacrimal gland (n=144)	1945-1954		1955-1964		1965-1974		1975-1984		1985-1994		1995-2004		2005-2015
		Hypertrophy	2 (100%)	Lymphocytic	2 (40%)	Pleomorphic adenoma	5 (42%)	Dacryoadenitis	9 (38%)	Pleomorphic adenoma	6 (32%)	Dacryoadenitis	21 (57%)	Normal	13 (29%)
				Normal	2 (40%)	Carcinoma	2 (17%)	Pleomorphic adenoma	4 (17%)	Dacryoadenitis	4 (21%)	Pleomorphic adenoma	4 (11%)	Cyst	13 (29%)
				Cyst	1 (20%)	Cyst	1 (8.3%)	Carcinoma	3 (13%)	Normal	4 (21%)	Carcinoma	3 (8.1%)	Dacryoadenitis	5 (11%)
						Dacryoadenitis	1 (8.3%)	Cyst	3 (13%)	Carcinoma	3 (16%)	Normal	3 (8.1%)	Lymphoma	4 (8.9%)
						Lymphoma	1 (8.3%)	Connective tissue	2 (8.3%)	Cyst	1 (5.3%)	Lymphoma	2 (5.4%)	Lymphatic hyperplasia	2 (4.4%)
						Malignant tumour, undefined	1 (8.3%)			Hypertrophy	1 (5.3%)			Pleomorphic adenoma	2 (4.4%)
						PICPS	1 (8.3%)
		Other diagnoses	0	Other diagnoses	0	Other diagnoses	0	Other diagnoses	3 (13%)	Other diagnoses	0	Other diagnoses	4 (11%)	Other diagnoses	6 (13%)
		Sum	2	Sum	5	Sum	12	Sum	24	Sum	19	Sum	37	Sum	45
	Retina (n=93)	1945-1954		1955-1964		1965-1974		1975-1984		1985-1994		1995-2004		2005-2015
		-		Glioma	1 (100%)	Normal	1 (50%)	Connective tissue	1 (100%)	Proliferative vitreoretinopathy	3 (33%)	CNV	14 (41%)	Epiretinal gliosis	9 (20%)
						Degenerative	1 (50%)			Blood	2 (22%)	Epiretinal gliosis	6 (18%)	CNV	7 (15%)
										Epiretinal gliosis	1 (13%)	Proliferative vitreoretinopathy	4 (12%)	Proliferative diabetic membrane	6 (13%)
										Malignant astrocytoma	1 (13%)	Unspecific membrane	3 (8.8%)	Proliferative vitreoretinopathy	6 (13%)
										Normal	1 (13%)	Blood	2 (5.9%)	Granuloma	4 (8.7%)
										Retinoblastoma	1 (13%)			Scar	4 (8.7%)
		Other diagnoses	0	Other diagnoses	0	Other diagnoses	0	Other diagnoses	0	Other diagnoses	0	Other diagnoses	5 (15%)	Other diagnoses	10 (22%)
		Sum	0	Sum	1	Sum	2	Sum	1	Sum	9	Sum	34	Sum	46
	Exenteration (n=59)	1945-1954		1955-1964		1965-1974		1975-1984		1985-1994		1995-2004		2005-2015
		Metastasis	3 (33%)	SCC	2 (50%)	Lymphoma	3 (43%)	Rhabdomyosarcoma	3 (38%)	BCC	7 (47%)	Melanoma	2 (25%)	Resection after R1	2 (25%)
		BCC	1 (11%)	Perforating trauma	1 (25%)	Acute inflammation	2 (29%)	Normal	2 (25%)	SCC	2 (13%)	Leiomyosarcoma	1 (13%)	Sebaceous gland carcinoma	2 (25%)
		Glaucoma	1 (11%)	Unspecific eyelid carcinoma	1 (25%)	Retinoblastoma	1 (14%)	BCC	1 (13%)	Atrophic optical nerve, retina, choroid	1 (6.7%)	Malignant schwannoma	1 (13%)	Anophthalmic socket inflammation	1 (13%)
		Limbal SCC	1 (11%)			Spindle cell sarcoma	1 (14%)	Malignant schwannoma	1 (13%)	Lymphoma	1 (6.7%)	Metastasis	1 (13%)	BCC	1 (13%)
		Lymphoma	1 (11%)					Meningeoma	1 (13%)	Malignant astrocytoma	1 (6.7%)	Neurofibrosarcoma	1 (13%)	Melanoma	1 (13%)
		Spindle cell sarcoma	1 (11%)							Pleomorphic lacrimal gland carcinoma	1 (6.7%)	Resection after R1	1 (13%)	SCC	1 (13%)
		Unspecific sarcoma	1 (11%)							Sebaceous gland carcinoma	1 (6.7%)	Sebaceous gland carcinoma	1 (13%)
										Sweat gland carcinoma	1 (6.7%)
		Other diagnoses	0	Other diagnoses	0	Other diagnoses	0	Other diagnoses	0	Other diagnoses	0	Other diagnoses	0	Other diagnoses	0
		Sum	9	Sum	4	Sum	7	Sum	8	Sum	15	Sum	8	Sum	8
	Sclera (n=38)	1945-1954		1955-1964		1965-1974		1975-1984		1985-1994		1995-2004		2005-2015
		-		Scleritis	1 (100%)	Filtering bleb revision	1 (33%)	Normal	2 (50%)	Filtering bleb revision	2 (29%)	Normal	6 (60%)	Scleritis	4 (31%)
						Normal	1 (33%)	Scleritis	2 (50%)	Scleritis	2 (29%)	Fistula	1 (10%)	Normal	2 (15%)
						Sclerouveitis	1 (33%)			Foreign body	1 (14%)	Foreign body granuloma	1 (10%)	Scar	2 (15%)
										Foreign body granuloma	1 (14%)	Sclera plaque	1 (10%)	Foreign body	1 (7.7%)
										Normal	1 (14%)	Scleritis	1 (10%)	Foreign body granuloma	1 (7.7%)
														Melanozytic lesion	1 (7.7%)
														Nevus	1 (7.7%)
														Scleral plaque	1 (7.7%)
		Other diagnoses	0	Other diagnoses	0	Other diagnoses	0	Other diagnoses	0	Other diagnoses	0	Other diagnoses	0	Other diagnoses	0
		Sum	0	Sum	1	Sum	3	Sum	4	Sum	7	Sum	10	Sum	13
	Anterior chamber angle (n=37)	1945-1954		1955-1964		1965-1974		1975-1984		1985-1994		1995-2004		2005-2015
		-		-		Sclera and trabecular meshwork	3 (100%)	Sclera and trabecular meshwork	14 (67%)	Sclera and trabecular meshwork	5 (71%)	-		Inflammation	2 (33%)
								Hemosiderin	2 (10%)	Connective tissue	1 (14%)			Connective tissue	1 (17%)
								Iridodialysis	2 (10%)	Pigmented trabecular meshwork	1 (14%)			Normal trabecular meshwork	1 (17%)
								Epithelial downgrowth	1 (4.8%)					Pigmented trabecular meshwork	1 (17%)
								Inflammation (trabecular meshwork)	1 (4.8%)					Trabecular meshwork with vacuoles	1 (17%)
								Sclerosis (trabecular meshwork)	1 (4.8%)
		Other diagnoses	0	Other diagnoses	0	Other diagnoses	0	Other diagnoses	0	Other diagnoses	0	Other diagnoses	0	Other diagnoses	0
		Sum	0	Sum	0	Sum	3	Sum	21	Sum	7	Sum	0	Sum	6
	Anterior chamber (n=27)	1945-1954		1955-1964		1965-1974		1975-1984		1985-1994		1995-2004		2005-2015
		-		Epithelial downgrowth	1 (100%)	Epithelial downgrowth	4 (80%)	Epithelial downgrowth	7 (100%)	-		Inflammation	3 (50%)	Inflammation	3 (38%)
						Inflammation	1 (20%)					Bleeding	2 (33%)	Epithelial downgrowth	2 (25%)
												Foreign body	1 (17%)	Bleeding	1 (13%)
														Connective tissue with hemosiderin	1 (13%)
														Unknown cells	1 (13%)
		Other diagnoses	0	Other diagnoses	0	Other diagnoses	0	Other diagnoses	0	Other diagnoses	0	Other diagnoses	0	Other diagnoses	0
		Sum	0	Sum	1	Sum	5	Sum	7	Sum	0	Sum	6	Sum	8
	Optic nerve (n=15)	1945-1954		1955-1964		1965-1974		1975-1984		1985-1994		1995-2004		2005-2015
		-		Atrophy	1 (100%)	Glioma	2 (40%)	Normal	2 (50%)	-		Malignant nerve sheath tumour	2 (40%)	-
						Atrophy	1 (20%)	Glioma	1 (25%)			Meningioma	2 (40%)
						Normal	1 (20%)	Meningioma	1 (25%)			Atrophy	1 (20%)
						Postoperative gliosis	1 (20%)
		Other diagnoses	0	Other diagnoses	0	Other diagnoses	0	Other diagnoses	0	Other diagnoses	0	Other diagnoses	0	Other diagnoses	0
		Sum	0	Sum	1	Sum	5	Sum	4	Sum	0	Sum	5	Sum	0
	This table presents the number and relative frequency of diagnoses from most topographical areas received within each 10-year interval (with the interval 2005-2015 spanning 11 years) during the observation period from 1945 to 2015. Diagnoses from the main topographical areas are listed as "Top 10", while those from less frequent areas are listed as "Top 5". In cases where diagnoses share the same…
	Legend
	BCC = Basal cell carcinoma
	BK w = Bullous keratopathy with previous intraocular surgery
	BK w/o = Bullous keratopathy without previous intraocular surgery
	CIN = Conjunctival intraepithelial neoplasia
	CNV = Choroidal neovascularisation
	FH = Fibrous histiocytoma
	MFH = Malignant fibrous histiocytoma
	Normal = Normal exenteration specimens (details see text)
	PHPV = Primary hyperplastic vitreous
	PICPS = Pluripotent immune cell proliferative syndrome
	Resection after R1 = Secondary surgery after incomplete resection. For exenteration specimens see details in the text.
	Salzmann = Salzmann nodular degeneration
	SCC = Squamous cell carcinoma
