# Supplementary material for: From post-war reconstruction to the 21st century – Ophthalmic pathology in Freiburg 1945-2015. Part 2: Review of 43,169 histological diagnoses from 39,256 specimens collected over 71 years at a large German tertiary eye care centre
Source: Research Square preprint supplement (doi:10.21203/rs.3.rs-7753867/v1), 2025-10-17
Supplement: Supplementary file 3 [file 2dc6e83fb2d45b8dabc35e27.xlsx]

## Sheet: Table 5
	Table 5: Comparison of conjunctival diagnoses with results from other studies
	Study	Region	Time period	Pterygium (%)	Nevus (%)	Pyogenic granuloma (%)	Conjunctivitis (%)	CIN (%)
	Grossniklaus et al. [16]	Baltimore (US)	1923-1984	18	8.1	4.2	10.2 a	8.7 b
	Our study	Freiburg (DE)	1945-1984	5.3	17	6.5	10	4.1
	Spraul and Grossniklaus [10]	Atlanta (US)	1941-1995	13	9.3	1.3	21 c	8.2
	Our study	Freiburg (DE)	1945-1995	13	17	8.4	9.1	3.8
	Shields et al. [17]	Philadelphia (US)	1974-2015	2.0 d	23 d	1.3 d	4.2 d,e	5.5 d
	Our study	Freiburg (DE)	1974-2015	6.0	13	2.9	6.0	5.4
	Pellerano et al. [40] f	Dominican Republic	2010-2018	-	35	-	2.9	12
	Our study	Freiburg (DE)	2010-2015		10		4.8	7.2
	Alkatan et al. [41]	Saudi Arabia	2015-2019	40	13	6.4	2.7 g	1.8
	Our study	Freiburg (DE)	2010-2015	41	10	7.2	4.8	7.2
	Mondal et al. [42]	Eastern India	2003-2010	22.5	4.16	8.33	3.33 g	10.83
	Our study	Freiburg (DE)	2003-2010	39	11	6.8	4.3	5.8
	Domingo et al. [14]	Philippines	2003-2012	-	9.4	5.5	3.9 h	10.2
	Our study	Freiburg (DE)	2003-2012		11	7.0	4.6	6.3
	This table presents a comparison of the relative frequencies of the five most prevalent conjunctival diagnoses in our study with those reported in existing literature.
	a Nonspecific non-granulomatous inflammation, nonspecific granulomatous inflammation, lymphoid hyperplasia, vernal inflammation, inflammatory pseudotumor
	b Dysplasia, carcinoma in situ
	c Non-granulomatous inflammation, granulomatous inflammation, lymphoid hyperplasia, (giant) papillary conjunctivitis, sarcoidosis, allergic conjunctivitis
	d Proportion of 5,002 cases with clinically suspected neoplasia
	e Conjunctivitis, reactive lymphoid hyperplasia
	f This study includes conjunctival tumours only
	g Reactive lymphoid hyperplasia
	h Atypical lymphoid hyperplasia, reactive lymphoid hyperplasia
