# Supplementary material for: From post-war reconstruction to the 21st century – Ophthalmic pathology in Freiburg 1945-2015. Part 2: Review of 43,169 histological diagnoses from 39,256 specimens collected over 71 years at a large German tertiary eye care centre
Source: Research Square preprint supplement (doi:10.21203/rs.3.rs-7753867/v1), 2025-10-17
Supplement: Supplementary file 4 [file 692cbbc6bde51c4412d704af.xlsx]

## Sheet: Table 5
	Table 6: Comparison of orbital and lacrimal gland diagnoses with results from other studies
			Orbital diagnoses						Lacrimal gland diagnoses
	Study	Region	Time period	Inflammation (%)	Lymphoma (%)	Fat tissue (%)	Metastasis (%)	Hemangioma (%)	Time period	Dacryoadenitis (%)	Pleomorphic adenoma (%)
	Bonavolontà et al. [49]	Naples (IT)	1976-2011	13	12	-	3.0	12	1976-2011	27	32
	Our study	Freiburg (DE)	1976-2011	9.3	10	8.1	5.8	6.3	1975-2015	39	15
	Koukkouli et al. [50]	Leeds (UK)	2003-2015	30	19	-	3.7	6.5	2003-2015	50	25
	Our study	Freiburg (DE)	2003-2015	4.6	18	6.4	2.9	3.5	2005-2015	11	4.4
	Kneaufsey et al. [51]	Dublin (IR)	2008-01/2018	36	12	-	6.5	10	2008-01/2018	18	-
	Our study	Freiburg (DE)	2008-2015	4.2	15	0.8	4.2	0.0	2005-2015	11	4.4
	Spraul and Grossniklaus [10]	Atlanta (US)	1941-1995	15	6.6	-	4.6	4.6	1941-1995	57	3.1
	Our study	Freiburg (DE)	1945-1995	14	1.2	4.3	4.3	8.0	1945-1994	23	24
	Kennedy [18] a	Rochester (US)	1949-1983	12	12 b	-	3.5	4.6	1949-1983	27	27
	Our study	Freiburg (DE)	1949-1983	17	1.0	0.5	4.1	8.7	1945-1984	23	21
	Shields et al. [19]	Philadelphia (US)	1962-1982	21	5.9	-	3.9	6.6	1962-1982	54	18
	Our study	Freiburg (DE)	1962-1982	13	1.4	0.0	3.4	8.3	1965-1984	28	25
	Shinder et al. [52]	Houston (US)	1998-2009	15	24	-	8.1 c	2.7 d	1998-2009	-	7.4
	Our study	Freiburg (DE)	1998-2009	6.6	21	12	8.6	4.6	1995-2004	32	7.3
	Shikishima et al. [53] e	Tokyo (JP)	1983-2002	22	12	-	3.0	5.9	1983-2002	3.8	64
	Our study	Freiburg (DE)	1983-2002	9.6	7.2	9.6	9.2	6.0	1985-2004	45	18
	This table presents a comparison of the relative frequencies of the five most prevalent orbital diagnoses in our study with those reported in existing literature.
	a Of the 820 clinical diagnoses, 500 were histologically confirmed, while the remainder were considered diagnostically convincing based on imaging findings
	b Lymphoma, lymphosarcoma, Burkitt's lymphoma, multiple myeloma, Hodgkin`s disease
	c Of the 28 clinical diagnoses, 15 were histologically confirmed
	d Cavernous hemangioma; of the 15 clinical diagnoses, 5 were histologically confirmed
	e Summary of in-house cases (1983–2002) and those reported in Japanese literature (1980–2004)
