# Supplementary material for: From post-war reconstruction to the 21st century – Ophthalmic pathology in Freiburg 1945-2015. Part 2: Review of 43,169 histological diagnoses from 39,256 specimens collected over 71 years at a large German tertiary eye care centre
Source: Research Square preprint supplement (doi:10.21203/rs.3.rs-7753867/v1), 2025-10-17
Supplement: Supplementary file 5 [file 96260b250abaa2921d148217.xlsx]

## Sheet: Table 3
	Table 3: Comparison of eyelid diagnoses with results from other studies
	Study	Region	Time period	Chalazion (%)	BCC (%)	Papilloma (%)
	Rohrbach et al. [8]	Tübingen (DE)	1940	3	0	-
	Our study	Freiburg (DE)	1945	0	0
	Rohrbach et al. [8]	Tübingen (DE)	1960	9	22	-
	Our study	Freiburg (DE)	1960	0	19
	Rohrbach et al. [8]	Tübingen (DE)	1980	34	14	-
	Our study	Freiburg (DE)	1980	9	20
	Rohrbach et al. [8]	Tübingen (DE)	1990	34	7	-
	Our study	Freiburg (DE)	1990	16	19
	Deprez and Uffer [15]	Lausanne (CH)	1989-2007	38	14a	-
	Our study	Freiburg (DE)	1989-2007	22	17
	Aurora and Blodi [9]	Iowa City (US)	1932-1969	12	19	18b
	Our study	Freiburg (DE)	1945-1969	6.9	21	17
	Spraul and Grossniklaus [10]	Atlanta (US)	1941-1995	16	10	21
	Our study	Freiburg (DE)	1945-1995	11	20	23
	Welch and Duke [11]	Baltimore (US)	1952-1956	13	11	25
	Our study	Freiburg (DE)	1952-1956	10	11	27
	Wang et al. [13]	South China	2000-2018	1.9	7.3	21
	Our study	Freiburg (DE)	2000-2015	25	17	14
	Domingo et al. [14]	Philippines	2003-2012	1.9	9.8	15
	Our study	Freiburg (DE)	2003-2012	26	16	13
	This table presents a comparison of the relative frequencies of the three most prevalent eyelid diagnoses in our study with those reported in existing literature.
	a Inflammatory lesions are not included
	b Seborrheic keratosis
