# Supplementary material for: From post-war reconstruction to the 21st century – Ophthalmic pathology in Freiburg 1945-2015. Part 2: Review of 43,169 histological diagnoses from 39,256 specimens collected over 71 years at a large German tertiary eye care centre
Source: Research Square preprint supplement (doi:10.21203/rs.3.rs-7753867/v1), 2025-10-17
Supplement: Supplementary file 6 [file fecc35d28d9ffa111e2bda22.xlsx]

## Sheet: Table 2
	Table 2: Changes in patient age at time of surgery across all topographical regions
	Eyelid	1945-1954	1955-1964	1965-1974	1975-1984	1985-1994	1995-2004	2005-2015
	Chalazion	27 (17-56)	34 (2-72)	43 (1-78)	50 (1-87)	42 (1-87)	45 (0-93)	45 (1-97)
	Basal cell carcinoma (BCC)	64 (46-78)	65 (41-85)	63 (20-91)	71 (18-94)	71 (26-100)	71 (21-100)	74 (22-102)
	Papilloma	57 (37-75)	61.5 (9-82)	63 (2-100)	63 (3-100)	64 (3-91)	64 (3-96)	64 (4-98)
	Resection after R1 (Secondary surgery after incomplete resection)	-	-	-	-	73 (38-90)	71 (21-95)	73 (22-97)
	Nevus	31.5 (14-49)	54 (14-73)	46 (7-80)	58 (5-87)	53 (4-85)	53 (4-92)	55 (5-94)
	Epidermal cyst	16 (2-52)	5 (2-71)	43 (1-74)	57 (3-87)	58 (2-89)	56.5 (2-87)	62 (1-97)
	Xanthelasma	48 (45-48)	53.5 (46-61)	48.5 (36-74)	50 (30-69)	49 (21-79)	53 (20-86)	53 (25-83)
	Granuloma	46.5 (22-71)	40 (2-65)	29 (0-76)	41 (2-79)	49 (0-84)	61 (6-91)	56 (5-85)
	Dermoid cyst	37 (2-72)	17 (15-59)	5 (0-78)	6 (1-76)	5.5 (0-61)	4 (0-82)	4 (0-90)
	Squamous cell carcinoma (SCC)	66 (45-82)	64.5 (43-85)	66.5 (53-77)	78 (67-93)	81 (51-90)	70 (21-94)	75 (23-94)
	Cornea	1945-1954	1955-1964	1965-1974	1975-1984	1985-1994	1995-2004	2005-2015
	Fuchs‘ dystrophy	-	-	70 (36-87)	70 (36-100)	72 (50-100)	71(42-90)	72 (27-95)
	Keratoconus	-	21 (19-23)	25 (13-63)	27 (11-83)	30 (15-92)	37 (14-79)	41 (14-83)
	Inflammation	47.5 (24-68)	52 (22-78)	51 (2-83)	47 (0-82)	54 (0-85)	60 (2-95)	59 (1-92)
	Transplant failure	36.5 (23-58)	30 (22-82)	41 (7-82)	58 (17-81)	67 (22-94)	62 (17-84)	63 (3-90)
	Scar	20a	33 (18-54)	43.5 (3-85)	49 (1-88)	61 (12-86)	56 (17-92)	61 (1-95)
	Bullous keratopathy with previous intraocular surgery (BK w)	-	-	60.5 (54-67)	66 (22-83)	76 (41-91)	77 (53-88)	75 (8-92)
	Bullous keratopathy without previous intraocular surgery (BK w/o)	-	-	71 (64-75)	62.5 (23-87)	71.5 (17-86)	70 (7-92)	71 (12-100)
	Ulcer	74.5 (72-77)	57.5 (15-78)	51 (16-63)	66 (18-89)	60 (0-85)	67 (1-93)	70.5 (5-99)
	Infection	-	56 (41-67)	61.5 (40-74)	31 (12-72)	27 (26-85)	50 (15-95)	58 (1-89)
	Squamous cell carcinoma	73.5 (57-77)	75a	49 (29-69)	-	-	74a	-
	Conjunctiva	1945-1954	1955-1964	1965-1974	1975-1984	1985-1994	1995-2004	2005-2015
	Pterygium	-	36 (31-41)	49 (21-71)	49 (30-89)	55 (11-85)	54 (25-90)	61 (4-96)
	Nevus	48 (27-52)	19 (8-66)	22.5 (6-64)	29 (0-81)	31 (3-89)	31 (2-93)	34 (3-89)
	Pyogenic granuloma	8 (4-12)	17 (7-77)	38 (29-68)	41.5 (1-85)	50 (6-81)	48,.5 (3-93)	56 (2-92)
	Conjunctivitis	53.5 (17-75)	47 (6-63)	50 (5-83)	43.5 (7-77)	52.5 (7-91)	48 (9-89)	54 (0-91)
	Conjunctival intraepithelial neoplasia (CIN)	-	84.5 (83-86)	72 (60-93)	69 (35-79)	68 (20-81)	65 (22-90)	65 (27-91)
	Papilloma	31 (22-58)	50 (28-72)	40 (4-70)	41 (6-88)	39 (16-84)	53 (3-93)	54 (3-88)
	Cyst	28 (14-42)	23 (9-70)	37 (2-72)	48 (1-78)	54.5 (7-78)	58 (4-92)	60 (1-85)
	Pinguecula	50.5 (45-56)	59.5 (38-81)	38.5 (27-68)	47.5 (34-62)	56 (26-80)	51.5 (18-82)	53 (26-93)
	Granuloma	27 (13-45)	20 (10-66)	10 (1-53)	44 (3-76)	33 (21-78)	56 (4-94)	50 (11-78)
	Squamous cell carcinoma	62 (53-78)	43 (5-76)	76 (57-95)	70 (50-84)	59 (56-61)	56 (28-91)	57 (34-91)
	Orbit	1945-1954	1955-1964	1965-1974	1975-1984	1985-1994	1995-2004	2005-2015
	Inflammation	59.5 (55-64)	56 (7-78)	64.5 (18-69)	59 (15-75)	58.5 (6-79)	51 (41-81)	46 (37-79)
	Lymphoma	73	-	-	71 (68-74)	66	69 (51-85)	67 (30-87)
	Fat tissue	-	14	-	-	66 (55-71)	64 (15-84)	70 (56-80)
	Hemangioma	- b	51 (48-54)	52 (36-64)	50 (29-59)	58.5 (39-81)	55 (34-80)	47 (45-49)
	Metastasis	45	59	56 (40-58)	55.5 (41-70)	67 (37-72)	63.5 (52-80)	71 (62-75)
	Granuloma	31	34 (14-54)	47.5 (47-48)	39 (14-64)	50 (17-64)	39 (35-47)	37 (25-60)
	Normal Muscle	-	20 (5-66)	48 (6-68)	-	59.5 (3-71)	57 (6-83)	-
	Scar	-	30 (26-34)	-	15.5 (14-17)	55.5 (39-72)	-	62.5 (38-87)
	Dermoid cyst	0	8	37 (34-40)	38 (6-43)	30 (29-33)	20 (2-39)	-
	Melanoma	-	-	50 (33-67)	57 (53-84)	34 (34-34)	60 (53-67)	70 (45-74)
	Lacrimal duct system	1945-1954	1955-1964	1965-1974	1975-1984	1985-1994	1995-2004	2005-2015
	Dacryocystitis	48 (5-76)	50 (0-77)	30 (1-78)	53 (18-87)	63.5 (38-85)	62 (24-93)	73 (17-95)
	Canaliculitis	-	-	66.5 (61-72)	62 (27-83)	53 (39-82)	62.5 (47-82)	54.5 (35-87)
	Lacrimal sac concrement	-	62	41 (25-57)	44 (28-61)	36 (26-68)	53 (29-80)	51.5 (31-79)
	Scar	55	-	27	58 (43-73)	52 (38-83)	76	70
	Normal	34	-	-	44 (25-63)	63 (40-86)	52 (17-81)	74 (40-84)
	Uvea	1945-1954	1955-1964	1965-1974	1975-1984	1985-1994	1995-2004	2005-2015
	Iris melanoma	51	60.5 (48-73)	59 (30-74)	67 (32-71)	36 (13-59)	57 (34-79)	72 (16-80)
	Normal iris	56	10	53 (32-67)	58 (27-82)	70 (64-84)	59 (5-92)	33 (2-71)
	Iritis	51 (40-70)	57 (50-64)	47.5 (2-72)	51.5 (44-59)	-	60.5 (29-81)	55 (21-81)
	Iris nevus	42 (29-55)	-	-	36 (1-65)	50 (43-57)	66.5 (28-80)	52 (31-73)
	Ciliary body melanoma	-	-	-	-	44 (44)	75 (47-76)	70 (66-74)
	Intraocular tissue	1945-1954	1955-1964	1965-1974	1975-1984	1985-1994	1995-2004	2005-2015
	Trauma-associated without retina	-	-	17.5 (4-31)	23	40.5 (9-91)	52 (2-92)	63.5 (5-97)
	Trauma-associated with retina	-	-	-	-	60 (19-88)	61 (5-94)	72 (30-93)
	Endophthalmitis	-	-	-	-	-	50	97
	Fibrin	-	-	-	-	-	-	73
	Vitreous	1945-1954	1955-1964	1965-1974	1975-1984	1985-1994	1995-2004	2005-2015
	Vitritis	-	-	-	32.5 (27-38)	58.5 (0-87)	63 (8-90)	73 (11-89)
	Normal	-	-	38	16	63.5 (60-67)	45 (24-83)	70 (40-79)
	Lymphoma	-	-	-	-	58	75.5 (62-79)	78 (63-83)
	Bleeding	-	-	-	54	47 (5-70)	54 (37-86)	67 (65-79)
	Persistent hyperplastic primary vitreous (PHPV)	-	-	-	1	13.5 (0-27)	0 (0-1)	14
	Lacrimal gland	1945-1954	1955-1964	1965-1974	1975-1984	1985-1994	1995-2004	2005-2015
	Dacryoadenitis	-	-	55	54 (14-70)	42 (41-64)	48 (2-74)	53 (42-64)
	Normal	-	17.5 (16-19)	-	73	68 (42-72)	47 (28-51)	37 (4-78)
	Pleomorphic adenoma	-	-	36 (26-55)	45 (37-58)	46.5 (29-67)	70 (32-87)	53.5 (40-67)
	Cyst	40.5 (40-41)	20	52	54 (41-61)	64	20.5 (2-39)	46 (29-69)
	Hypertrophy	-	-	-	-	65	-	-
	Retina	1945-1954	1955-1964	1965-1974	1975-1984	1985-1994	1995-2004	2005-2015
	Choroidal neovascularisation	-	-	-	-	-	74 (44-84)	81 (13-90)
	Epiretinal gliosis	-	-	-	-	71	47.5 (39-64)	74 (23-82)
	Proliferative vitreoretinopathy	-	-	-	-	55 (53-75)	75 (22-89)	51.5 (17-84)
	Connective tissue	-	-	-	22	-	83	65
	Normal	-	-	41	-	83	77	29 (16-67)
	Exenteration	1945-1954	1955-1964	1965-1974	1975-1984	1985-1994	1995-2004	2005-2015
	Basal cell carcinoma	44	-	-	61	72 (52-81)	-	93
	Squamous cell carcinoma	48	66.5	-	-	56.5 (44-69)	-	84
	Inflammation	-	64	48 (24-72)	-	-	-	45
	Normal	-	-	-	70 (69-71)	-	69 (11-67)	-
	Lymphoma	11	-	62 (9-62)	-	80	-	-
	Sclera	1945-1954	1955-1964	1965-1974	1975-1984	1985-1994	1995-2004	2005-2015
	Normal	-	-	65	50.5 (44-57)	62	71 (42-81)	61 (56-66)
	Scleritis	-	54	-	51 (28-74)	32.5 (10-55)	61	53 (32-77)
	Filtering bleb revision	-	-	76	-	68 (57-79)	-	-
	Foreign body granuloma	-	-	-	-	23	71	30
	Foreign body	-	-	-	-	77	-	65
	Sclerouveitis	-	-	20	-	-	-	-
	Anterior chamber angle	1945-1954	1955-1964	1965-1974	1975-1984	1985-1994	1995-2004	2005-2015
	Sclera and trabecular meshwork	-	-	65 (62-74)	58 (9-68)	48 (15-82)	-	-
	Inflammation	-	-	-	53	-	-	72.5 (72-73)
	Connective tissue	-	-	-	-	48	-	66
	Hemosiderin	-	-	-	53.5 (40-67)	-	-	-
	Pigmented trabecular meshwork	-	-	-	-	62	-	71
	Iridodialysis	-	-	-	56.5 (49-64)	-	-	-
	Anterior chamber	1945-1954	1955-1964	1965-1974	1975-1984	1985-1994	1995-2004	2005-2015
	Epithelial downgrowth	-	28	64.5 (51-79)	65 (40-81)	-	-	55.5 (38-73)
	Inflammation	-	-	46	-	-	51 (44-52)	83 (70-84)
	Bleeding	-	-	-	-	-	75.5 (65-86)	42
	Foreign body	-	-	-	-	-	33	-
	Unspecific cells	-	-	-	-	-	-	72
	Optic nerve	1945-1954	1955-1964	1965-1974	1975-1984	1985-1994	1995-2004	2005-2015
	Meningioma	-	-	-	61	-	26 (15-37)	-
	Glioma	-	-	17 (5-29)	8	-	-	-
	Atrophy	-	62	29	-	-	5	-
	Normal	-	-	57	35 (34-36)	-	-	-
	Malignant nerve sheet tumour	-	-	-	-	-	74.5 (67-82)	-
	This table presents the median patient age and age range at the time of surgery for each 10-year interval (with the interval 2005-2015 spanning 11 years) for frequently submitted diagnoses throughout the entire observation period from 1945 to 2015. The diagnoses are ordered by listing the most frequent diagnoses for each topographic region, arranged in descending order based on the mean values of…
	a Age information is available for only one patient
	b Age information not available

## Sheet: Berechnung Häufigkeit Diagnosen
Eyelid	1945-1954					1955-1964					1965-1974					1975-1984					1985-1994					1995-2004					2004-2015					Summe	Relative Häufigket über den gesamten Zeitraum
Gesamt des jeweiligen Intervalls			83					210					746					2206					3009					4942					10568			21764		Reihenfolge absteigend
Dermoid cyst			2					5					36					64					60					80				113				360	0.0165411	4
Epidermal cyst			4					8					47					135					115					120				299				728	0.0334497	1
Granuloma			2					10					13					33					56					52				88				254	0.0116706	3
Squamous cell carcinoma (SCC)			0					25					8					10					21					45				140				249	0.0114409	5
Xanthelasma			0					0					8					31					37					78				305				459	0.0210899	2
Hornhaut	1945-1954		27	"Korrektur"		1955-1964		49	"Korrektur"		1965-1974		260	"Korrektur"		1975-1984		568	"Korrektur"		1985-1994		817			1995-2004		1216			2004-2015		4382			Summe Diagnose	7319
Infection			0					0					0					0					0					0				0				0
Squamous cell carcinoma			4					1					0					0					0					0				0				5
Ulcer			7					4					7					19					35					93				246				411
Bindehaut	1945-1954		48			1955-1964		83			1965-1974		287			1975-1984		431			1985-1994		628			1995-2004		1637			2004-2015		2849			Summe Diagnose	5963
Cyst			3					4					30					27					32					62				96				254	0.042596	1
Granuloma			5					13					15					11					9					36				26				115	0.0192856	3
Pinguecula			3					2					12					9					19					54				107				206	0.0345464	2
Squamous cell carcinoma			5					4					6					11					4					14				27				71	0.0119068	4
Orbita	1945-1954		14			1955-1964		33			1965-1974		65			1975-1984		91			1985-1994		103			1995-2004		144 (+ggf. 2 ohne Diagnose)			2004-2015		85			Summe Diagnose	535
Dermoid cyst			1					1					2					3					0					7				0				14	0.0261682	4
Fat tissue			0					1					0					0					9					15				12				37	0.0691589	1
Granuloma			1					2					0					0					10					3				6				22	0.0411215	3
Hemangioma			1					2					5					9					9					7				2				35	0.0654206	2
Melanoma			0					0					2					6					2					0				0				10	0.0186916	5
Metastasis			1					2					3					2					5					17				5				35	0.0654206	2
Normal Muscle			0					4					7					0					4					7				0				22	0.0411215	3
Scar			2					2					0					7					3					0				8				22	0.0411215	3
Tränenwege	1945-1954		33			1955-1964		47			1965-1974		22 (+ ggf. 1 Bericht fehlt)			1975-1984		37 (+ ggf. 1 Befund fehlt)			1985-1994		30			1995-2004		70			2004-2015		67			Summe Diagnose	306
Normal			0					0					1					0					0					3				0				4	0.0130719
Scar			1					1					1					2					1					0				0				6	0.0196078
Uvea (Aderhaut, Iris)	1945-1954					1955-1964					1965-1974					1975-1984					1985-1994					1995-2004					2004-2015
Aderhaut allgemein	1945-1954		1			1955-1964		-			1965-1974		3			1975-1984		8			1985-1994		1			1995-2004		8			2004-2015		8			Summe Diagnose	239
Ciliary body melanoma			0					0					1					0					2					5				2				10	0.041841	3
Iris nevus			3					0					0					3					2					4				2				14	0.0585774	2
Iritis			1					0					6					2					0					5				7				21	0.0878661	1
intraokular	1945-1954		-			1955-1964		-			1965-1974		1			1975-1984		1			1985-1994		31	(eigentlich 32)		1995-2004		82			2004-2015		69			Summe Diagnose	185
Endophthalmitis																												1				1						1
Fibrin																																1						2
Glaskörper	1945-1954		-			1955-1964		1			1965-1974		2			1975-1984		6			1985-1994		25 (+ ggf. 1 Befund fehlt)			1995-2004		73 (+ggf. 1 nicht auswertbar)			2004-2015		70 (+ gg 7 kein Material)			Summe Diagnose	177
Bleeding																		1					3					4				3				11	0.0621469	1
Persistent hyperplastic primary vitreous (PHPV)																		1					2					5				1				9	0.0508475	2
Tränendrüse	1945-1954		2			1955-1964		5			1965-1974		12			1975-1984		24			1985-1994		19			1995-2004		37			2004-2015		45			Summe Diagnose	144
Cyst			0					1					1					3					1					1					13			20	0.138889	2
Hypertrophy			2					0					0					0					1					0					0			3	0.0208333	3
Pleomorphic adenoma			0					0					5					4					6					4					2			21	0.145833	1
Netzhaut	1945-1954		-			1955-1964		1			1965-1974		2			1975-1984		1			1985-1994		9 (+ggf. 1 Befund fehlt)			1995-2004		34 (+ ggf, 5 Präparat verloren)			2004-2015		53 (+ ggf. 7 ohne Diagnose)
Connective tissue			0					0					0					1					3					9					2
Glioma			0					1					0					0					0					0					0
Normal			0					0					1					0					0					3					0
Proliferative vitreoretinopathy			0					0					0					0					1					0					7
Exenteratio	1945-1954		9 (+ggf 1 Bericht fehlt)			1955-1964		5			1965-1974		7 (+ ggf. 2 Berichte fehlen)			1975-1984		8			1985-1994		15			1995-2004		10			2004-2015		8
Inflammation			0					0					1					1					0					0					1			3		1
Lymphoma			0					0					3					0					1					0					0			4		2
Normal			0					0					0					2					0					1					0			3		1
Sklera	1945-1954		-			1955-1964		1			1965-1974		6			1975-1984		4			1985-1994		7			1995-2004		10			2004-2015		13 (+ ggf. 4 keine Diagnose)
Filtering bleb revision													1					0					3					0					0			4		1
Foreign body													0					0					1					0					1			2		3a
Foreign body granuloma													0					0					1					1					1			3		2
Sclerouveitis								1					1					0					0					0					0			2		3b
Kammerwinkel	1945-1954		-			1955-1964		-			1965-1974		-			1975-1984		21			1985-1994		7			1995-2004		0 (ggf. 1 kein Präparat)			2004-2015		6
Connective tissue			0					0					0					1					1					0					0			2		1a
Hemosiderin			0					0					0					2					0					0					0			2		1b
Iridodialysis			0					0					0					0					0					0					0			0		2
Pigmented trabecular meshwork			0					0					0					0					1					0					1			2		1c
Vorderkammer	1945-1954		-			1955-1964		1			1965-1974		5			1975-1984		-			1985-1994		-			1995-2004		6 (+ ggf. 1 kein Material)			2004-2015		8 (+ ggf. 3 kein Präparat)
Bleeding			0					0					0					0					0					2					1			3		1
Foreign body			0					0					0					0					0					1					0			1		2a
Unspecific cells			0					0					0					0					0					0					1			1		2b
